# Supplementary material
Source: publisher site journal article supplement (https://static.cambridge.org/content/id/urn:cambridge.org:id:article:S1368980020002463/resource/name/S1368980020002463supp001.docx)
Supplement: Supplementary file 1 [file S1368980020002463supp001.docx]

Supplementary Table 1. List of variables extracted from treatment cards

|  | Category | Variable name | Type | Value (where applicable) | | |  |  |  |
| --- | --- | --- | --- | --- | --- | --- | --- | --- | --- |
| At enrolment | Demography | House location | nominal |  |  |  |  |  |  |
|  |  | Name of caregiver and contact | nominal |  |  |  |  |  |  |
|  |  | Referral from | nominal | community, other outpatient facility, inpatient | | | | |  |
|  |  | Mother alive | binary | yes, no |  |  |  |  |  |
|  |  | Father alive | binary | yes, no |  |  |  |  |  |
|  |  | Total number in household | discrete |  |  |  |  |  |  |
|  |  | Sex | nominal | male, female | |  |  |  |  |
|  |  | Age (month) | discrete |  |  |  |  |  |  |
|  | Admission criteria | Mid-Upper Arm Circumference | continuous |  |  |  |  |  |  |
|  |  | Weight | continuous |  |  |  |  |  |  |
|  |  | oedema | ordinal | O, 1+, 2+, 3+ | |  |  |  |  |
|  |  | appetite test | nominal | passed, failed | |  |  |  |  |
|  | Medical History | Diarrhoea | binary | yes, no |  |  |  |  |  |
|  |  | vomiting | binary | yes, no |  |  |  |  |  |
|  |  | Cough | binary | yes, no |  |  |  |  |  |
|  |  | Breastfeeding | binary | yes, no |  |  |  |  |  |
|  |  | Fully immunised | binary | yes, no |  |  |  |  |  |
|  |  | appetite | nominal | good, poor, not done | | |  |  |  |
|  |  | stools/day | ordinal | 1-3,4-5, >5 | |  |  |  |  |
|  | Physical examination | Eye | nominal | normal, sunken, discharge | | |  |  |  |
|  |  | Conjunctiva | nominal | normal, pale | |  |  |  |  |
|  |  | Ears | nominal | normal, discharge | |  |  |  |  |
|  |  | Enlarged lymph nodes | nominal | none, neck, axilla, groin | | |  |  |  |
|  |  | Skin changes | nominal | none, scabies, peeling, ulcers, abscesses | | | |  |  |
|  |  | Mouth | nominal | normal, sores | |  |  |  |  |
|  |  | Respiratory rate | ordinal | <30, 30-39, 40-49, >50 | | |  |  |  |
|  |  | Temperature (degrees celsius) | ordinal | <37.5, ≥37.5 | |  |  |  |  |
|  |  | Dehydration | ordinal | none, moderate, severe | | |  |  |  |
|  |  | Chest indrawing | binary | yes, no |  |  |  |  |  |
|  |  | Disability | binary | yes, no |  |  |  |  |  |
|  | Routine medications/ treatment | Mebendazole | binary | yes, no |  |  |  |  |  |
|  |  | Amoxicillin | binary | yes, no |  |  |  |  |  |
|  |  | Vitamin A | binary | yes, no |  |  |  |  |  |
|  |  | Malaria test result | nominal | positive, negative, not done | | |  |  |  |
|  |  | Measles immunization | binary | yes, no |  |  |  |  |  |
| During weekly follow-up visits | Patient characteristics | Fever | binary | yes, no |  |  |  |  |  |
|  |  | Cough | binary | yes, no |  |  |  |  |  |
|  |  | Appetite test | nominal | passed, failed, not done | | |  |  |  |
|  |  | Respiratory Rate | discrete |  |  |  |  |  |  |
|  |  | Number of RUTF units given | discrete |  |  |  |  |  |  |
|  |  | Bilateral oedema | ordinal | O, 1+, 2+ | |  |  |  |  |
|  |  | Diarrhoea | nominal | yes, no |  |  |  |  |  |
|  |  | Vomiting | nominal | yes, no |  |  |  |  |  |
|  |  | Anaemia/ pallor | nominal | yes, no |  |  |  |  |  |
|  |  | Dehydrated | binary | yes, no |  |  |  |  |  |
|  |  | Temperature (degrees celsius) | interval |  |  |  |  |  |  |
|  |  | Mid-Upper Arm Circumference | continuous |  |  |  |  |  |  |
|  |  | Weight | continuous |  |  |  |  |  |  |
|  |  | Visit outcome | nominal | absent, continue treatment, defaulted, cured, non-recovered, died, referred, refused referral | | | | | |
